# Supplementary material
Source: publisher figshare collection journal article supplement (https://karger.figshare.com/articles/dataset/_/4004946)
Supplement: Supplementary file 1 [file 1]

## Supporting Information

### Exclusion criteria: Complete list

Clinically relevant excursions of laboratory parameters; irritable bowel syndrome; acute or chronic disease of the gastrointestinal tract; presence of occult blood on screening; abdominal surgery within the last 6 months prior to study start; known pelvic floor dysfunction; acute or chronic kidney or urinary tract disease; susceptibility to development of uric acid or calcium-containing kidney stones; acute or chronic neurological or psychiatric illness; any serious organ or systemic diseases that could influence the outcome of the clinical trial; known sensitivity to the ingredients of the investigational product; use of any preparations that could affect the gastrointestinal tract (e.g. probiotics, laxatives, enema, obstipating drugs etc.) during the last 2 weeks and during the study; use of sympathomimetics and cardiac glycosides; magnesium and calcium supplementation during the study; intake of mineral water other than the investigational product during the study; pregnancy or nursing (women of childbearing potential); drug, alcohol or medication abuse; participation in another clinical trial during the last 30 days prior to study start; persons that are in relationship or dependence to the sponsor or the investigator; subject is a prisoner; presence of other factor(s) that, in the investigator's judgement, should preclude subject participation (i.e. compliance).

### Laboratory Analyses: Results of further secondary efficacy endpoints

*Liver and lipid metabolism function laboratory parameters:* At screening, there were differences between the groups for GGT<sup>1</sup> (mineral water 24 U/l; placebo 17 U/l;  $P = .047$ ), ALP<sup>2</sup> (mineral water 71 U/l; placebo 62 U/l;  $P = .049$ ) and in the safety parameter uric acid (mineral water 285  $\mu\text{mol/l}$ ; placebo 258  $\mu\text{mol/l}$ ;  $P = .031$ ), but these differences were not clinically relevant.

At visit 4, triglycerides were lower in the placebo group (mineral water 1.21 mmol/l; placebo 1.04 mmol/l;  $P = .033$ ), but the difference was not clinically relevant.

*Gut microbiota parameters:* At visit 4, there was a change in potentially beneficial *E. coli* (less in the mineral water group;  $P = .038$ ) and yeastlike fungi (more in the mineral water group;  $P = .009$ ).

*Safety laboratory parameters:* At visit 4, there were changes in the safety parameters leucocytes (mineral water 6.6  $\mu\text{l}$ ; placebo 6.0  $\mu\text{l}$ ;  $P = .042$ ) and uric acid (mineral water 289  $\mu\text{mol/l}$ ; placebo 265  $\mu\text{mol/l}$ ;  $P = .025$ ), however not clinically relevant.

<sup>1</sup>GGT, gamma-glutamyltransferase

<sup>2</sup>ALP, alkaline phosphatase
