# Supplementary material
Source: publisher figshare collection journal article supplement (https://karger.figshare.com/articles/dataset/_/4004946)
Supplement: Supplementary file 2 [file 1]

## Supporting Information

**Table S1:**  
**Mineralisation content of Ensinger**  
**Schiller Quelle mineral water.**

| <b>Cations</b>               | <b>mg/L</b> |
|------------------------------|-------------|
| Lithium                      | 0,89        |
| Sodium                       | 28,9        |
| Potassium                    | 7,34        |
| Ammonium                     | <0,01       |
| Magnesium                    | 105         |
| Calcium                      | 573         |
| Strontium                    | 12          |
| Manganese                    | 0,038       |
| Iron                         | 0,014       |
| <b>Anions</b>                | <b>mg/L</b> |
| Fluoride                     | 0,49        |
| Chloride                     | 31,4        |
| Bromide                      | <0,05       |
| Iodide                       | 0,008       |
| Sulfate                      | 1535        |
| Nitrite                      | <0,005      |
| Nitrate                      | 2,7         |
| Hydrogen phosphate           | <0,01       |
| Hydrogen carbonate           | 347         |
| <b>Undissociated solutes</b> | <b>mg/L</b> |
| Meta-boric acid              | 1,63        |
| Meta-silicic acid            | 20,7        |
| <b>Gaseous solutes</b>       | <b>mg/L</b> |
| Carbon dioxide               | 2650        |

**Table S2:**  
**Mineralisation content of tap**  
**water control (placebo).**

| <b>Cations</b>         | <b>mg/L</b> |
|------------------------|-------------|
| Lithium                | --          |
| Sodium                 | 5,2         |
| Potassium              | 1,4         |
| Ammonium               | <0,010      |
| Magnesium              | 8,0         |
| Calcium                | 48          |
| Strontium              | 0,46        |
| Manganese              | <0,0005     |
| Iron                   | 0,0051      |
| <b>Anions</b>          | <b>mg/L</b> |
| Fluoride               | 0,09        |
| Chloride               | 7,0         |
| Nitrite                | 0,005       |
| Nitrate                | 4,2         |
| Sulfate                | 34,0        |
| <b>Gaseous solutes</b> | <b>mg/L</b> |
| Carbon dioxide         | 2650        |
